# Supplementary material for: Transcriptome of Male Breast Cancer Matched with Germline Profiling Reveals Novel Molecular Subtypes with Possible Clinical Relevance
Source: MDPI journal article supplement (doi:10.3390/cancers13184515), 2021-09-08
Supplement: s1 [file s1]

**Supplementary Table S1.** Pathogenic mutations identified in the analyzed MBC series.

| <b>ID case</b> | <b>Gene</b>   | <b>Variant type</b>     | <b>Nucleotide change*</b> | <b>Protein change</b> |
|----------------|---------------|-------------------------|---------------------------|-----------------------|
| #17            | <i>BRCA1</i>  | Large deletion          | Del exons 21_24           | -                     |
| #2             | <i>BRCA1</i>  | Frameshift              | c.3228_3229del            | p.Gly1077AlafsTer8    |
| #31            | <i>BRCA1</i>  | Frameshift              | c.2679_2682del            | p.Lys893AsnfsTer106   |
| #60            | <i>BRCA1</i>  | Frameshift              | c.4964_4982del            | p.Ser1655TyrfsTer16   |
| #63            | <i>BRCA1</i>  | Large deletion          | Del exons 1_23            | -                     |
| #66            | <i>BRCA1</i>  | Stop gain               | c.5266dup                 | p.Gln1756ProfsTer74   |
| #14            | <i>BRCA2</i>  | Splice acceptor variant | c.632-2A>G                | -                     |
| #18            | <i>BRCA2</i>  | Stop gain               | c.9382C>T                 | p.Arg3128Ter          |
| #19            | <i>BRCA2</i>  | Frameshift              | c.6626_6627del            | p.Ile2209ArgfsTer15   |
| #21            | <i>BRCA2</i>  | Stop gain               | c.7480C>T                 | p.Arg2494Ter          |
| #25            | <i>BRCA2</i>  | Frameshift              | c.5796_5797del            | p.His1932GlnfsTer12   |
| #26            | <i>BRCA2</i>  | Large deletion          | Del exons 14_16           | -                     |
| #28            | <i>BRCA2</i>  | Stop gain               | c.9382C>T                 | p.Arg3128Ter          |
| #29            | <i>BRCA2</i>  | Frameshift              | c.2760del                 | p.Ile921PhefsTer39    |
| #30            | <i>BRCA2</i>  | Frameshift              | c.5722_5723del            | p.Leu1908ArgfsTer2    |
| #36            | <i>BRCA2</i>  | Stop gain               | c.289G>T                  | p.Glu97Ter            |
| #61            | <i>BRCA2</i>  | Stop gain               | c.6037A>T                 | p.Lys2013Ter          |
| #62            | <i>BRCA2</i>  | Frameshift              | c.7940_7941insC           | p.Ser2648LysfsTer14   |
| #64            | <i>BRCA2</i>  | Frameshift              | c.6743_6755del            | p.His2248LeufsTer28   |
| #65            | <i>BRCA2</i>  | Frameshift              | c.2760del                 | p.Ile921PhefsTer39    |
| #67            | <i>BRCA2</i>  | Frameshift              | c.8247_8248del            | p.Lys2750AspfsTer13   |
| #70            | <i>BRCA2</i>  | Frameshift              | c.9098_9099insA           | p.Gln3034fs           |
| #68            | <i>PALB2</i>  | Frameshift              | c.2167_2168delAT          | p.Met723ValfsTer21    |
| #71            | <i>PALB2</i>  | Stop gain               | c.1984A>T                 | p.Lys662Ter           |
| #69            | <i>RAD50</i>  | Frameshift              | c.1238_1241delAACT        | p.Gln413ArgfsTer2     |
| #56            | <i>RAD51D</i> | Frameshift              | c.293delA                 | p.Asp98ValfsTer25     |

\*Based on *BRCA1* NM\_007294.3, *BRCA2* NM\_000059.4, *PALB2* NM\_024675.3, *RAD50* NM\_005732.3, *RAD51D* NM\_001142571.1
