# Supplementary figures and images for: Transcriptome of Male Breast Cancer Matched with Germline Profiling Reveals Novel Molecular Subtypes with Possible Clinical Relevance
Source: MDPI journal article supplement (doi:10.3390/cancers13184515), 2021-09-08

(A)

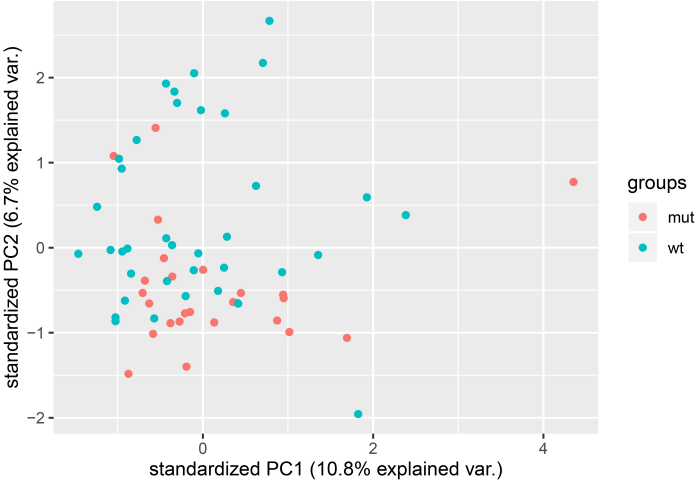

(B)

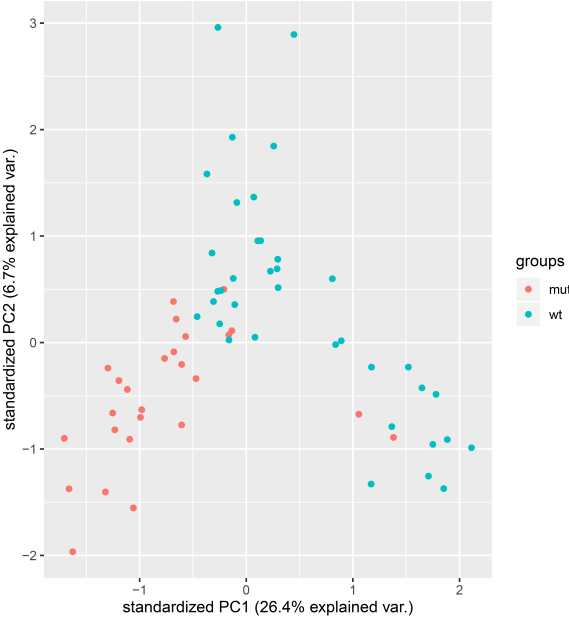

(C)

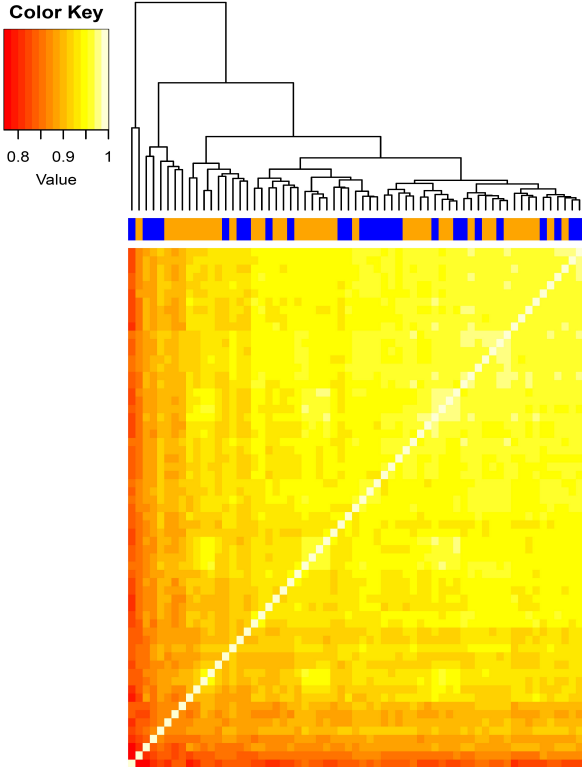

(D)

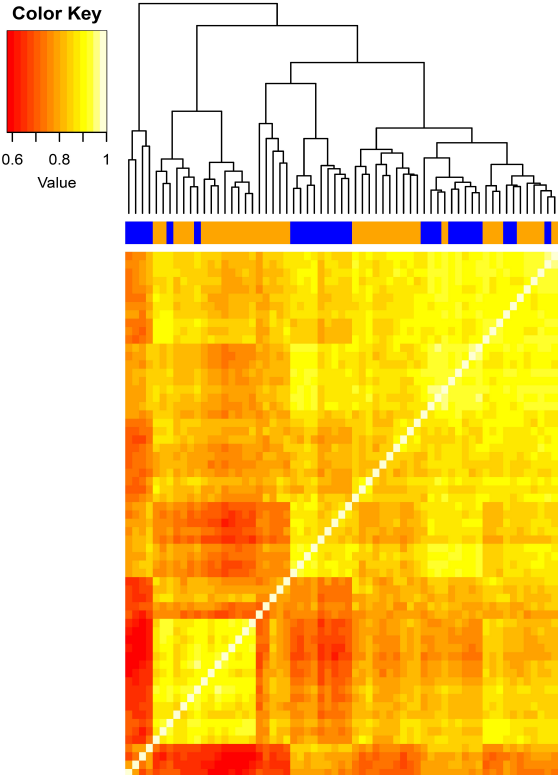

Supplement: s1 [file s1]

**(A)****BARD1** $p=0.015$ 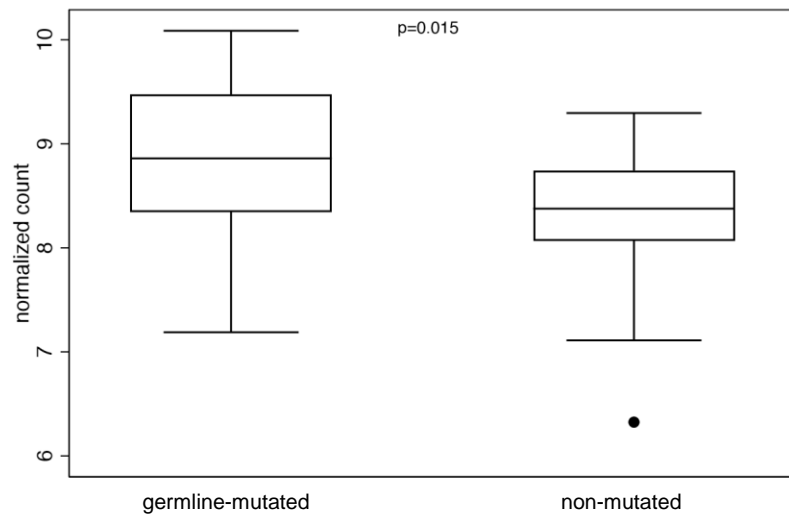**(B)****BRIP1** $p=0.00001$ 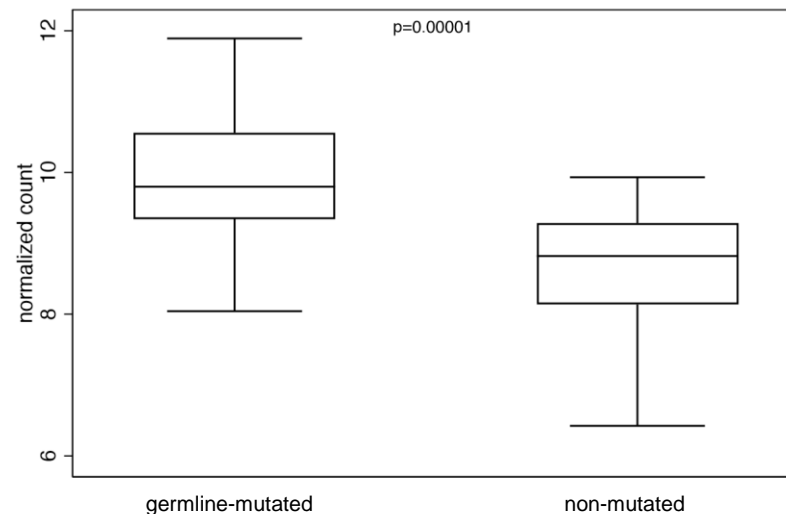**(C)****XRCC2** $p=0.045$ 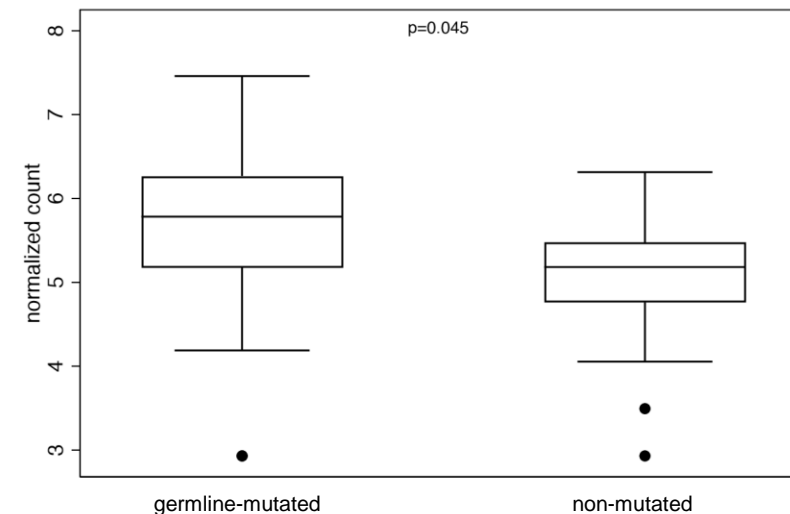**(D)****FOXO1** $p=0.016$ 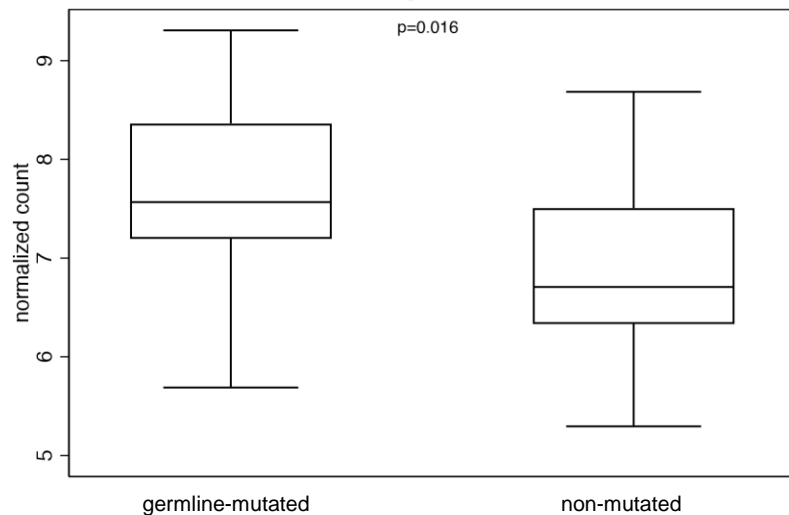**(E)****AURKA** $p=0.003$ 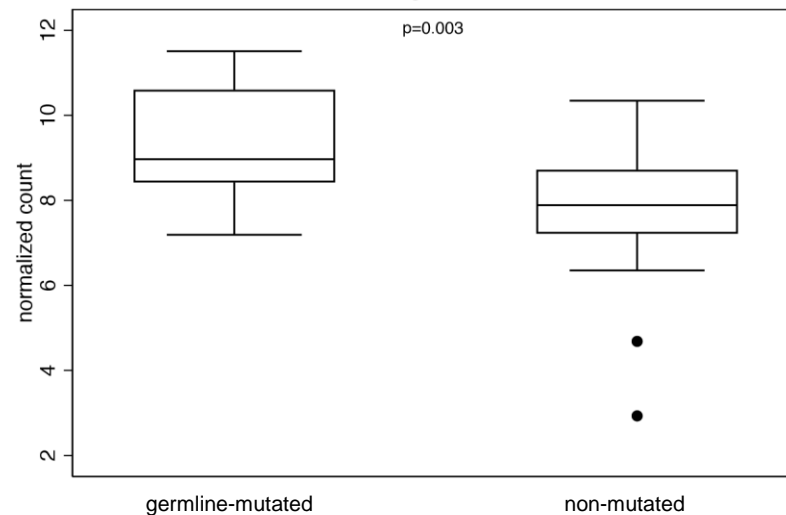**(F)****NAT1** $p=0.007$ 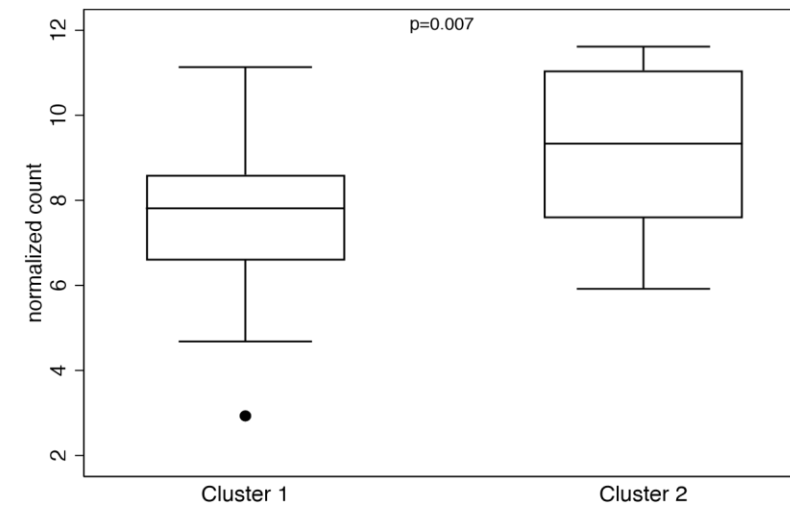

Supplement: s1 [file s1]
